# Supplementary material for: Evaluation of Astatine-211-Labeled Fibroblast Activation Protein Inhibitor (FAPI): Comparison of Different Linkers with Polyethylene Glycol and Piperazine
Source: MDPI journal article supplement (doi:10.3390/ijms24108701), 2023-05-12
Supplement: s1 [file s1]

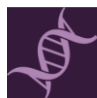

# Evaluation of Astatine-211-Labeled Fibroblast Activation Protein Inhibitor (FAPI): Comparison of Different Linkers with Polyethylene Glycol and Piperazine

Ayaka Aso, Hinako Nabetani, Yoshifumi Matsuura, Yuichiro Kadonaga, Yoshifumi Shirakami, Tadashi Watabe\*, Taku Yoshiya, Masayoshi Mochizuki, Kazuhiro Ooe, Atsuko Kawakami, Naoya Jinno, Atsushi Toyoshima, Hiromitsu Haba, Yang Wang, Jens Cardinale, Frederik L. Giesel, Atsushi Shimoyama, Kazuko Kaneda-Nakashima\*, Koichi Fukase

Supporting information

## Contents

### 1. Experimental section of chemical experiments

#### 1-1. General method

##### For non-radiolabeled compounds

NMR spectra were recorded on the JEOL ECA500 spectrometer (500 MHz for  $^1\text{H}$  and 126 MHz for  $^{13}\text{C}$ ) and Bruker AVANCENE0700 spectrometer (700 MHz for  $^1\text{H}$  and 176 MHz for  $^{13}\text{C}$ ). Chemical shifts were reported in parts per million (ppm) relative to the internal residual solvent ( $^1\text{H}$  NMR,  $\text{CDCl}_3$  7.26 ppm,  $(\text{CD}_3)_2\text{SO}$  2.50 ppm,  $\text{CD}_3\text{OD}$  3.31 ppm,  $\text{D}_2\text{O}$  4.47 ppm;  $^{13}\text{C}$  NMR,  $\text{CDCl}_3$  77.2 ppm,  $(\text{CD}_3)_2\text{SO}$  39.5 ppm,  $\text{CD}_3\text{OD}$  49.0 ppm).  $^{13}\text{C}$  NMR spectra with  $\text{D}_2\text{O}$  were measured with a small amount of  $\text{CH}_3\text{CN}$  (1.47 ppm) as an internal standard. Multiplicities are reported using the following abbreviations: s = singlet, d = doublet, t = triplet, q = quartet, m = multiplet, br = broad. High-resolution mass spectra were recorded on Thermo Fisher Scientific Q-Exactive Orbitrap (ESI-q-Orbitrap). Preparative HPLC was performed by LC-8A (Shimadzu), LC-20AP (Shimadzu) and LC-20AD (Shimadzu). For preparative HPLC of **S3**, **S5**, B-FAPI1 and B-FAPI2, YMC-ODS AA12305-2530WT (250 × 30 mm, YMC) was used. For preparative HPLC of B-FAPI3 and B-FAPI4, COSMOSIL 5C<sub>18</sub>-AR-300 (10 mm × 250 mm, Nacalai tesque) was used. All other commercially available reagents and solvents were used as purchased. Optical rotations were recorded on the Perkin-Elmer 241 Polarimeter.

##### For radiolabeled compounds

Radioactivity of  $^{211}\text{At}$  was determined by  $\gamma$ -ray spectrometry with a Ge semiconductor detector (BE-2020, Mirion Technologies (Canberra) Inc.), Curie meter IGC-7 (Hitachi Ltd.), and Curie meter IGC-8B (Hitachi Ltd.). TLC silica gel 60 F<sub>254</sub> (Merck) was used for TLC analysis of radiolabeled products. The TLC plate was exposed to an imaging plate (GE Healthcare), and the imaging plate was scanned by Typhoon FLA 7000 (GE Healthcare). Oasis HLB Plus Light Cartridge (weight: 30 mg, particle size: 30  $\mu\text{m}$ , Waters corporation) was used for purification of  $^{211}\text{At}$ -FAPI1,  $^{211}\text{At}$ -FAPI2,  $^{211}\text{At}$ -FAPI3,  $^{211}\text{At}$ -FAPI4 and  $^{211}\text{At}$ -FAPI5.

## 1-2. Abbreviation list

AcOH: Acetic acid

AcOEt: Ethyl acetate

DIPEA: *N,N*-Diisopropylethylamine

DMF: *N,N*-Dimethylformamide

EDC: 1-Ethyl-3-(3-dimethylaminopropyl)-carbodiimide

HATU: 1-[Bis(dimethylamino)methylene]-1H-1,2,3-triazolo[4,5-b]pyridinium 3-Oxide Hexafluorophosphate

HOAt: 1-Hydroxy-7-azabenzotriazole

MS4A: Molecular sieves, 4 Å

NMP: *N*-methylpyrrolidone

TMSOTf: Trimethylsilyl Trifluoromethanesulfonate

TFA: Trifluoroacetic acid



1H), 8.90 (d,  $J = 4.5$  Hz, 1H), 8.10 (t,  $J = 5.6$  Hz, 1H), 8.04 (d,  $J = 9.2$  Hz, 1H), 7.98 (d,  $J = 2.7$  Hz, 1H), 7.69 (d,  $J = 8.0$  Hz, 2H), 7.62 (d,  $J = 4.6$  Hz, 1H), 7.55 (dd,  $J = 9.1, 2.8$  Hz, 1H), 7.20 (d,  $J = 7.8$  Hz, 2H), 4.81 (dd,  $J = 7.9, 3.5$  Hz, 1H), 4.35–4.28 (m, 2H), 4.25 (dd,  $J = 16.8, 6.2$  Hz, 1H), 4.21 (dd,  $J = 16.8, 5.8$  Hz, 1H), 3.83 (t,  $J = 4.4$  Hz, 2H), 3.73 (ddd,  $J = 9.4, 7.6, 4.1$  Hz, 1H), 3.55 (dd,  $J = 16.0, 8.6$  Hz, 1H), 3.51 (t,  $J = 5.9$  Hz, 2H), 3.40 (s, 2H), 3.28–3.21 (m, 2H), 2.27–2.13 (m, 2H), 2.12–2.00 (m, 2H);  $^{13}\text{C}$ -NMR (176 MHz,  $(\text{CD}_3)_2\text{SO}$ )  $\delta$ : 170.1, 167.4, 167.0, 157.3, 146.4, 142.7, 142.1, 138.3, 134.0, 129.1, 128.0, 125.8, 123.6, 119.3, 119.2, 104.8, 69.2, 68.5, 67.8, 46.3, 45.3, 42.4, 41.5, 40.0, 38.7, 29.4, 24.8; HRMS (ESI-q-orbitrap) calcd for  $\text{C}_{29}\text{H}_{32}\text{BN}_5\text{O}_7\text{Na}$  ( $\text{M} + \text{Na}$ ) $^+$  596.2287, found: 596.2294.

#### 1-4. Synthetic procedure of B-FAPI2

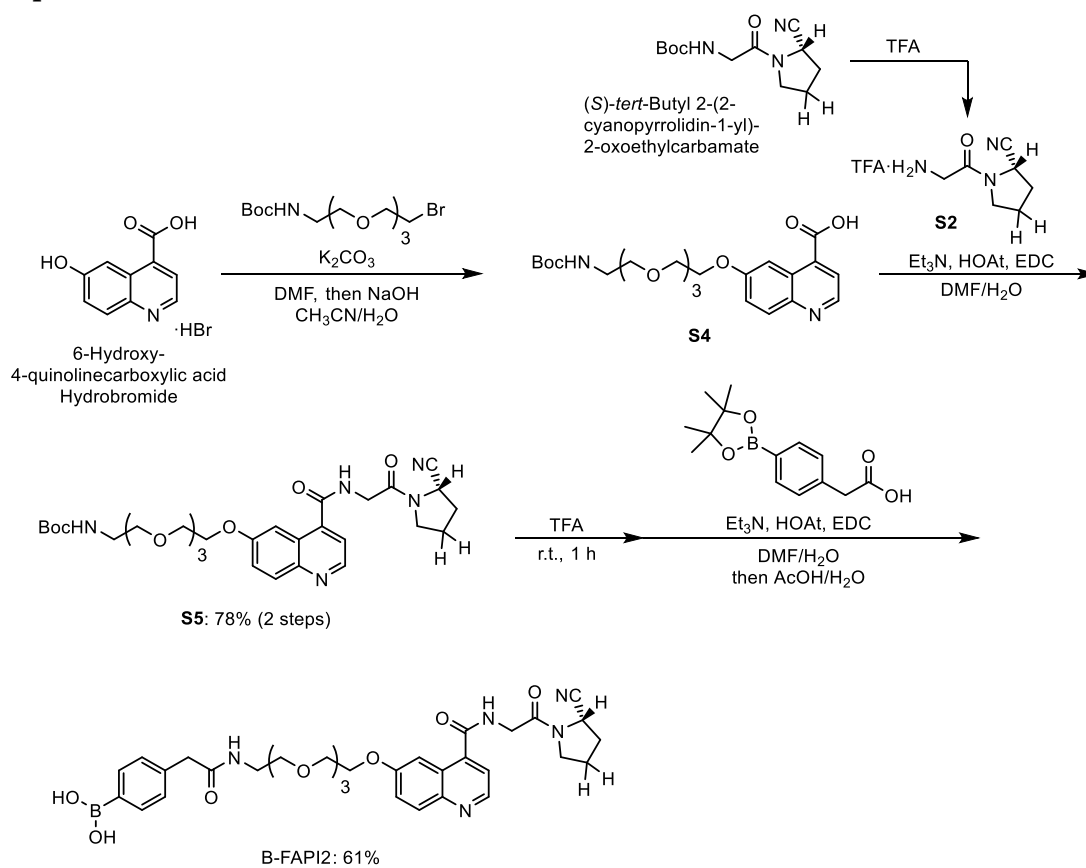

Scheme S2. Synthesis of B-FAPI2

#### Coupled S5

$\text{K}_2\text{CO}_3$  (1.6 g, 12 mmol) and tert-Butyl 2-(2-(2-(2-bromoethoxy)ethoxy)ethoxy)ethylcarbamate (1.3 g, 3.6 mmol) were added to a solution of 6-Hydroxy-4-quinolinecarboxylic acid hydrobromide (0.32 g, 1.2 mmol) in DMF (5 mL) at 65 °C. After being stirred at 65 °C for 4 h, the reaction mixture was cooled down to room temperature, filtered through filter paper and concentrated. The residues were dissolved in  $\text{CH}_3\text{CN}/\text{H}_2\text{O}$  (3:2) (10 mL) and 5 M NaOH in  $\text{H}_2\text{O}$  (1.2 mL, 6.0 mmol) was added at 0 °C and the reaction mixture was stirred at room temperature for 30 minutes. After the reaction was quenched with AcOH at 0 °C, the mixture was concentrated. The residue was dissolved in AcOEt. The organic layer was washed with brine, dried over  $\text{Na}_2\text{SO}_4$  and concentrated. The residue was crystallized with  $\text{CHCl}_3$  and Hexane to give N-Boc-PEG4 **S4**, which was used for the next reaction without further purification.

A solution of (S)-tert-Butyl 2-(2-cyanopyrrolidin-1-yl)-2-oxoethylcarbamate (301 mg, 1.19 mmol) in TFA (10 mL) was stirred at 0 °C for 40 minutes. The reaction mixture was concentrated to give amine **S2**, which was used for the next reaction without further purification.

**S4**, HOAt (0.18 g, 1.3 mmol) and H<sub>2</sub>O (1 mL) were added to a solution of **S2** neutralized by Et<sub>3</sub>N in DMF (9 mL) at room temperature. After the mixture was cooled down to 0 °C, EDC (0.24 mL, 1.3 mmol) was added and the reaction mixture was stirred at room temperature for 1.5 h, and then concentrated. The residue was purified by reversed phase HPLC (10 % to 60 % linear gradient of 0.05 % TFA in acetonitrile in 0.05 % TFA in water, over 80 min, flow rate of 20 mL/minute) to give coupled **S5** (0.56 g, 78 % in 2 steps): white solid;  $[\alpha]_D^{22}$  -51 (c 0.1, CH<sub>3</sub>OH); <sup>1</sup>H-NMR (500 MHz, (CD<sub>3</sub>)<sub>2</sub>SO) δ: 9.06 (t, *J* = 6.0 Hz, 1H), 8.87 (d, *J* = 4.5 Hz, 1H), 8.02 (d, *J* = 9.2 Hz, 1H), 7.96 (d, *J* = 2.8 Hz, 1H), 7.59 (d, *J* = 4.6 Hz, 1H), 7.54 (dd, *J* = 9.2, 2.8 Hz, 1H), 6.71 (s, 1H), 4.82 (dd, *J* = 7.9, 3.5 Hz, 1H), 4.33-4.25 (m, 2H), 4.29-4.16 (m, 2H), 3.84 (t, *J* = 4.5 Hz, 2H), 3.77-3.70 (m, 1H), 3.64-3.58 (m, 2H), 3.59-3.52 (m, 3H), 3.54-3.45 (m, 4H), 3.37 (t, *J* = 6.1 Hz, 2H), 3.05 (q, *J* = 5.9 Hz, 2H), 2.29-2.12 (m, 2H), 2.15-2.00 (m, 2H), 1.36 (s, 9H); <sup>13</sup>C-NMR ((CD<sub>3</sub>)<sub>2</sub>SO) δ: 167.5, 167.4, 156.9, 155.6, 147.5, 144.1, 141.0, 130.7, 125.4, 122.5, 119.2, 119.1, 104.6, 77.6, 69.9, 69.7, 69.7, 69.5, 69.1, 68.7, 67.7, 46.3, 45.3, 41.5, 29.4, 28.2, 24.9.; HRMS (ESI-q-orbitrap) calcd for C<sub>30</sub>H<sub>41</sub>N<sub>5</sub>O<sub>8</sub>Na (M + Na)<sup>+</sup> 622.2847, found: 622.2853.

#### B-FAPI2

A solution of **S5** (0.21 g, 0.35 mmol) in TFA (5 mL) was stirred at room temperature for 1 h. After the reaction mixture was concentrated, the residue was dissolved in DMF (2 mL) and neutralized with Et<sub>3</sub>N. To the neutralized mixture were added 4-(Carboxymethyl)phenylboronic acid pinacol ester (0.10 g, 0.38 mmol), HOAt (52 mg, 0.39 mmol) and H<sub>2</sub>O (0.2 mL) at room temperature. After the mixture was cooled down to -78 °C, EDC (69 µL, 0.39 mmol) was added and the reaction mixture was stirred for 1.5 h at room temperature, and then concentrated. The residue was dissolved in AcOH/H<sub>2</sub>O (1:4) (2 mL). After being stirred at room temperature for 17 h, the reaction mixture was diluted with H<sub>2</sub>O. Reversed-phase HPLC (10 % to 50 % linear gradient of 0.1 % TFA in acetonitrile in 0.1 % TFA in water, over 80 minutes, flow rate of 20 mL/minute) gave B-FAPI2 (0.14 g, 61%): white solid;  $[\alpha]_D^{22}$  -17 (c 0.1, CH<sub>3</sub>CN); <sup>1</sup>H-NMR (700 MHz, (CD<sub>3</sub>)<sub>2</sub>SO) δ: 9.07 (t, *J* = 6.0 Hz, 1H), 8.88 (d, *J* = 4.4 Hz, 1H), 8.05 (t, *J* = 5.7 Hz, 1H), 8.02 (d, *J* = 9.1 Hz, 1H), 7.97 (d, *J* = 2.8 Hz, 1H), 7.69 (d, *J* = 7.6 Hz, 2H), 7.60 (d, *J* = 4.6 Hz, 1H), 7.54 (dd, *J* = 9.2, 2.8 Hz, 1H), 7.20 (d, *J* = 7.6 Hz, 2H), 4.81 (dd, *J* = 8.0, 3.4 Hz, 1H), 4.33-4.27 (m, 2H), 4.25 (dd, *J* = 16.8, 6.2 Hz, 1H), 4.20 (dd, *J* = 16.8, 5.7 Hz, 1H), 3.84 (t, *J* = 4.4 Hz, 2H), 3.75-3.70 (m, 1H), 3.63-3.59 (m, 2H), 3.57-3.53 (m, 3H), 3.53-3.50 (m, 2H), 3.50-3.47 (m, 2H), 3.41-3.38 (m, 4H), 3.19 (q, *J* = 5.8 Hz, 2H), 2.25-2.19 (m, 1H), 2.19-2.13 (m, 1H), 2.12-2.00 (m, 2H); <sup>13</sup>C-NMR (176 MHz, (CD<sub>3</sub>)<sub>2</sub>SO) δ: 170.0, 176.5, 167.0, 157.2, 146.6, 142.4, 138.3, 134.0, 129.4, 128.0, 125.7, 123.4, 119.3, 119.2, 104.8, 69.9, 69.7, 69.7, 69.5, 69.0, 68.6, 67.8, 46.3, 45.3, 42.4, 41.5, 40.0, 38.7, 29.4, 24.9; HRMS (ESI-q-orbitrap) calcd for C<sub>33</sub>H<sub>40</sub>BN<sub>5</sub>O<sub>9</sub>Na (M + Na)<sup>+</sup> 684.2811, found: 684.2819.

### 1-5. Synthetic procedure of B-FAPI3

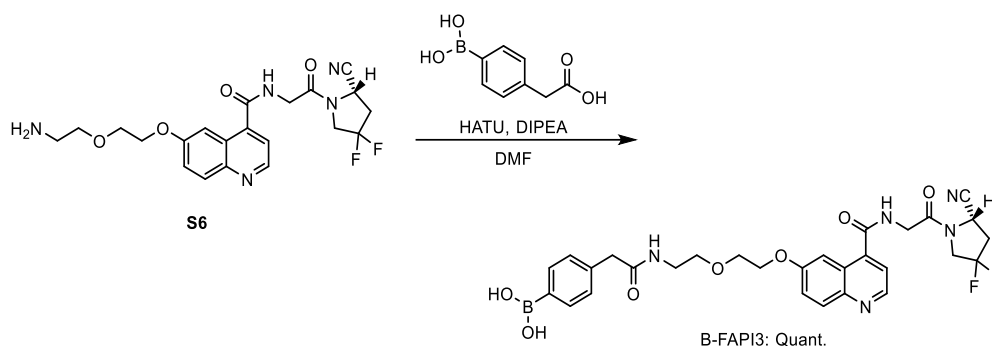

Scheme S3. Synthesis of B-FAPI3

#### B-FAPI3

DIPEA (20.0  $\mu$ L, 115  $\mu$ mol) was added to a solution of 4-(Carboxymethyl) phenylboronic acid (8.0 mg, 44.5  $\mu$ mol) and HATU (14.0 mg, 36.8  $\mu$ mol) in DMF (1.0 mL), and the mixture was stirred at room temperature for 5 minutes. After **S6** (2.8 mg, 6.3  $\mu$ mol) as a known compound<sup>1</sup> was added to the mixture, the resulting mixture was stirred at room temperature for 19.5 h. The reaction mixture was concentrated. The residue was purified by reversed phase HPLC (2 % to 98 % linear gradient of 0.1 % TFA in acetonitrile in water, over 40 minutes, flow rate of 7.0 mL/minute) to give B-FAPI3 (3.8 mg, quant.): white solid;  $[\alpha]_D^{22}$  -9 (c 0.1, CH<sub>3</sub>CN); <sup>1</sup>H-NMR (700 MHz, (CD<sub>3</sub>)<sub>2</sub>SO)  $\delta$ : 9.06 (t,  $J$  = 6.0 Hz, 1H), 8.81 (d,  $J$  = 4.3 Hz, 1H), 7.99 (d,  $J$  = 9.2 Hz, 1H), 7.92 (s, 1H), 7.89 (d,  $J$  = 2.8 Hz, 1H), 7.69 (d,  $J$  = 7.8 Hz, 2H), 7.51 (d,  $J$  = 4.2 Hz, 1H), 7.47 (dd,  $J$  = 9.2, 2.9 Hz, 1H), 7.20 (d,  $J$  = 7.7 Hz, 2H), 5.14 (dd,  $J$  = 9.5, 2.8 Hz, 1H), 4.37–4.27 (m, 1H), 4.31–4.24 (m, 2H), 4.29–4.18 (m, 2H), 4.18–4.09 (m, 1H), 3.82 (t,  $J$  = 4.4 Hz, 2H), 3.50 (t,  $J$  = 5.8 Hz, 2H), 3.40 (s, 2H), 3.26–3.22 (m, 2H), 2.96–2.85 (m, 1H), 2.81 (t,  $J$  = 14.0 Hz, 1H); <sup>13</sup>C-NMR (176 MHz, (CD<sub>3</sub>)<sub>2</sub>SO)  $\delta$ : 170.1, 170.0, 168.0, 167.5, 156.8, 147.5, 144.1, 140.8, 138.2, 134.0, 130.7, 128.0, 125.3, 122.5, 119.1, 117.7, 104.5, 69.2, 68.5, 67.6, 51.2, 44.2, 44.2, 42.3, 41.3, 40.0, 38.5, 36.3; HRMS (ESI-q-orbitrap) calcd for C<sub>29</sub>H<sub>30</sub>BF<sub>2</sub>N<sub>5</sub>O<sub>7</sub>Na (M + Na)<sup>+</sup> 632.2099, found: 632.2104.

## 1-6. Synthetic procedure of B-FAPI4

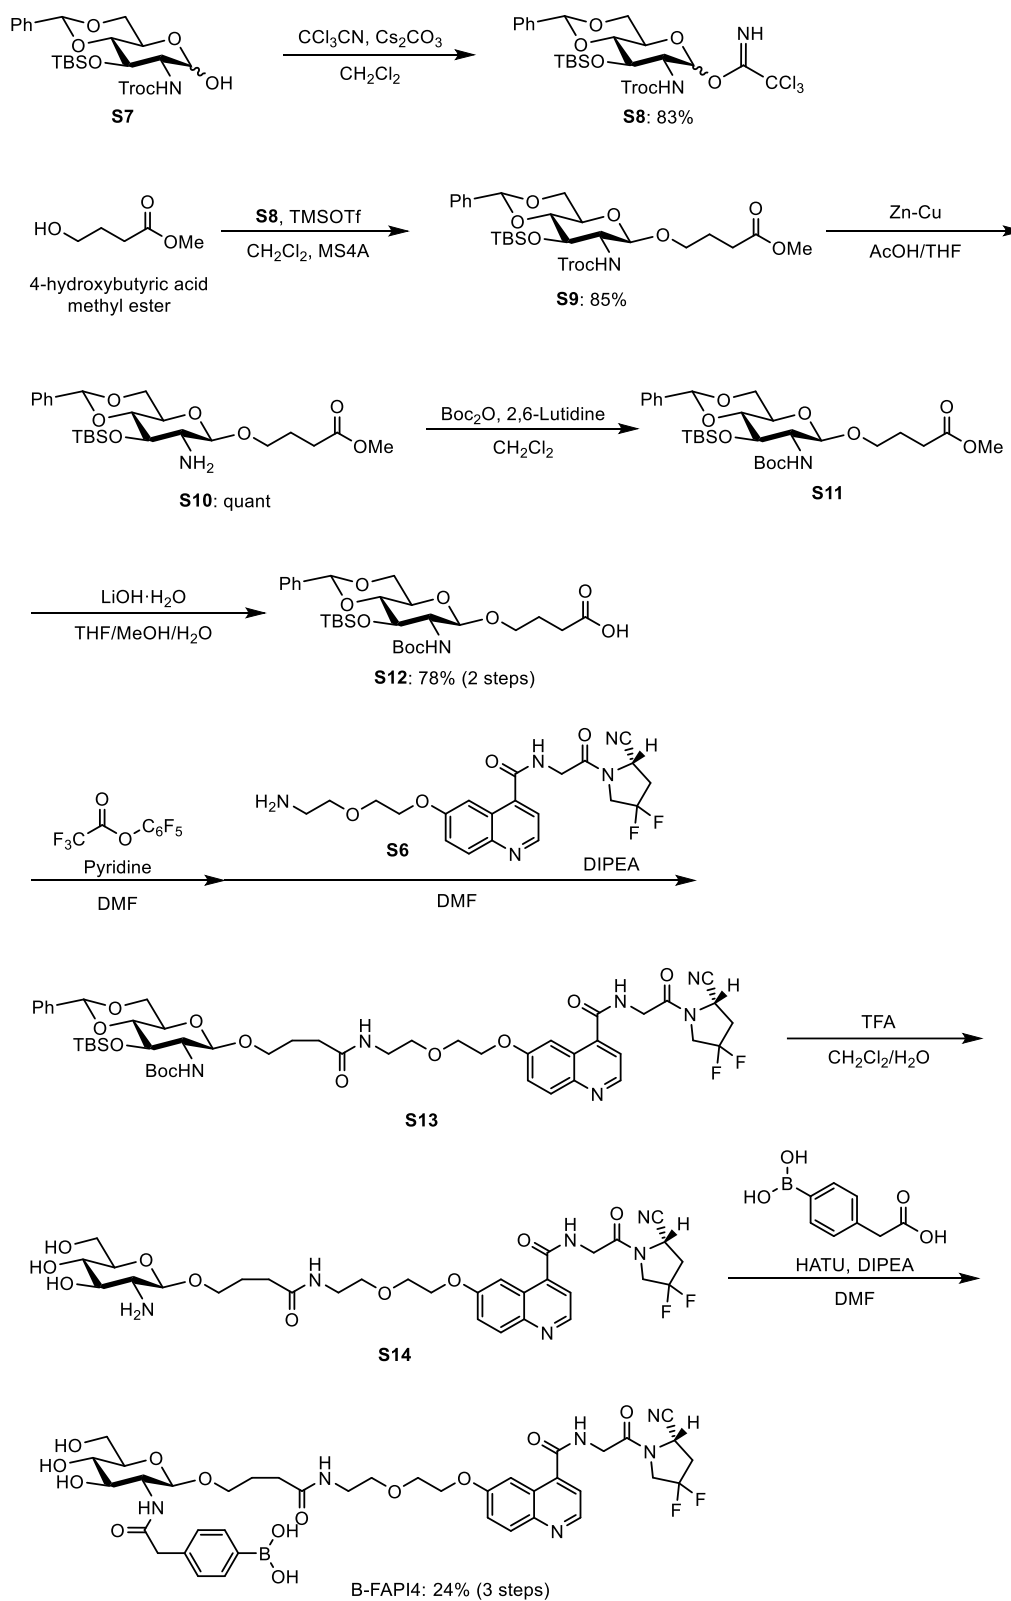

Scheme S4. Synthesis of B-FAPI4

### Imidate **S8**

$\text{CCl}_3\text{CN}$  (6.6 mL, 65.8 mmol) and  $\text{Cs}_2\text{CO}_3$  (5.38 g, 16.5 mmol) were added to a solution of **S7** (4.6 g, 8.3 mmol) as a known compound<sup>2</sup> in  $\text{CH}_2\text{Cl}_2$  (160 mL) at room temperature. After being stirred at room temperature for 40 minutes, the reaction mixture was filtered through a Celite pad and washed with  $\text{CH}_2\text{Cl}_2$ , and then concentrated. The residue was purified by silica-gel column chromatography (Toluene/AcOEt, 30:1) to give imidate **S8** (4.8 g, 83 %): colorless amorphous oil;  $^1\text{H}$ -NMR ( $\text{CDCl}_3$ , 500 MHz)  $\delta$ : 8.74 (s, 1H), 7.53–7.45 (m, 2H), 7.40–7.33 (m, 3H), 6.33 (d,  $J$  = 3.8 Hz, 1H), 5.56 (s, 1H), 4.97 (d,  $J$  = 9.7 Hz, 1H), 4.79 (d,  $J$  = 12.0 Hz, 1H), 4.61 (d,  $J$  = 11.9 Hz, 1H), 4.32 (dd,  $J$  = 10.4, 4.9 Hz, 1H), 4.17 (td,  $J$  = 9.7, 3.8 Hz, 1H), 4.04–3.91 (m, 2H), 3.78 (t,  $J$  = 10.3 Hz, 1H), 3.66 (t,  $J$  = 9.3 Hz, 1H), 0.84 (s, 9H), 0.08 (s, 3H), 0.02 (s, 3H).

### Glycoside **S9**

4-Hydroxybutyric acid methyl ester (1.9 mL, 17.2 mmol) was added to a mixture of **S8** (4.0 g, 5.70 mmol) and MS4A in  $\text{CH}_2\text{Cl}_2$  (115 mL) at room temperature. After the mixture was cooled down to 0 °C, TMSOTf (103  $\mu\text{L}$ , 570  $\mu\text{mol}$ ) was added and the reaction mixture was stirred at the same temperature for 20 minutes, and then warmed up to room temperature. The reaction was quenched with  $\text{Et}_3\text{N}$ . The mixture was extracted with AcOEt. The organic layer was washed with  $\text{H}_2\text{O}$  and brine, dried over  $\text{Na}_2\text{SO}_4$  and concentrated. The residue was purified via silica-gel column chromatography (Hexane/Acetone, 89:11) gave glycoside **S9** (3.2 g, 85 %): white solid;  $^1\text{H}$ -NMR (500 MHz,  $\text{CDCl}_3$ )  $\delta$ : 7.49–7.40 (m, 2H), 7.37–7.25 (m, 3H), 5.83–5.56 (m, 1H), 5.37 (s, 1H), 4.77–4.64 (m, 2H), 4.52 (d,  $J$  = 8.5 Hz, 1H), 4.26 (dd,  $J$  = 10.0, 4.3 Hz, 1H), 3.90 (t,  $J$  = 8.5 Hz, 1H), 3.90–3.80 (m, 1H), 3.70 (t,  $J$  = 10.1 Hz, 1H), 3.63 (s, 3H), 3.55–3.35 (m, 3H), 3.42–3.27 (m, 1H), 2.45–2.30 (m, 2H), 1.93–1.78 (m, 2H), 0.81 (s, 9H), 0.03 (s, 3H), -0.03 (s, 3H);  $^{13}\text{C}$ -NMR (126 MHz,  $\text{CDCl}_3$ )  $\delta$ : 173.8, 154.2, 137.2, 129.0, 128.0, 126.3, 101.5, 101.2, 95.4, 82.0, 74.6, 72.0, 68.5, 68.4, 65.9, 59.3, 51.5, 30.3, 25.7, 24.8, 18.1, -4.1, -4.9; HRMS (ESI-q-orbitrap) calcd for  $\text{C}_{27}\text{H}_{40}\text{Cl}_3\text{NO}_9\text{SiNa}$  ( $\text{M} + \text{Na}$ )<sup>+</sup> 678.1430, found: 678.1433.

### Amine **S10**

Activated Zn-Cu (prepared from 1.5 g of Zn) was added to a solution of **S9** (500 mg, 761  $\mu\text{mol}$ ) in AcOH/THF (1:1) (76 mL) at room temperature. After being stirred at the same temperature for 2 h, the reaction mixture was filtered through a celite pad with AcOEt. The filtrate was concentrated with toluene, and then the residue was neutralized with saturated aqueous  $\text{NaHCO}_3$ . The mixture was extracted with AcOEt. The organic layer was washed with water and brine, dried over  $\text{Na}_2\text{SO}_4$  and concentrated. The residue was purified via silica-gel column chromatography (Toluene/AcOEt, 5:1, 2:1) to give amine **S10** (367 mg, quant.): colorless oil;  $^1\text{H}$ -NMR (500 MHz,  $(\text{CD}_3)_2\text{SO}$ )  $\delta$ : 7.45–7.40 (m, 2H), 7.39–7.34 (m, 3H), 5.60 (s, 1H), 4.31 (d,  $J$  = 7.9 Hz, 1H), 4.17 (dd,  $J$  = 10.2, 4.8 Hz, 1H), 3.79–3.69 (m, 2H), 3.59 (s, 3H), 3.57 (t,  $J$  = 8.9 Hz, 2H), 3.52–3.37 (m, 3H), 2.39 (t,  $J$  = 7.4 Hz, 2H), 1.84–1.75 (m, 2H), 1.53 (s, 2H), 0.82 (s, 9H), 0.05 (s, 3H), -0.05 (s, 3H);  $^{13}\text{C}$ -NMR (126 MHz,  $(\text{CD}_3)_2\text{SO}$ )  $\delta$ : 173.1, 137.6, 128.8, 127.9, 126.1, 103.7, 100.8, 81.1, 74.8, 67.9, 67.8, 65.8, 58.8, 51.2, 29.9, 25.8, 24.6, 18.0, -4.1, -4.7; HRMS (ESI-q-orbitrap) calcd for  $\text{C}_{24}\text{H}_{40}\text{NO}_7\text{Si}$  ( $\text{M} + \text{H}$ )<sup>+</sup> 482.2569, found: 482.2566.

### Carboxylic acid **S12**

2,6-Lutidine (220  $\mu\text{L}$ , 1.89 mmol) and Boc<sub>2</sub>O (2.0 mL, 6.76 mmol) were added to a solution of **S10** (329 mg, 682 mmol) in  $\text{CH}_2\text{Cl}_2$  (68 mL) at room temperature. After the reaction mixture was stirred at room temperature for 61 h, the reaction was quenched with sat. aqueous  $\text{NH}_4\text{Cl}$ . The mixture was extracted with  $\text{CH}_2\text{Cl}_2$ . The organic layer was washed with  $\text{H}_2\text{O}$  and brine, dried over  $\text{Na}_2\text{SO}_4$  and concentrated. The residue was purified via silica-gel



column chromatography (Toluene/EtOAc, 100:0, 1:1) to give *N*-Boc **S11**, which was used for the next reaction without further purification.

LiOH·H<sub>2</sub>O (172 mg, 4.10 mmol) was added to a solution of **S11** in THF/MeOH/H<sub>2</sub>O (3:2:2) (70 mL) at 0 °C. After the reaction mixture was stirred at room temperature for 19 h, the reaction was quenched with 0.5 M aqueous HCl. The mixture was extracted with CH<sub>2</sub>Cl<sub>2</sub>. The organic layer was washed with H<sub>2</sub>O and brine, dried over Na<sub>2</sub>SO<sub>4</sub> and concentrated. The residue was purified via silica-gel column chromatography (Toluene/ AcOEt, 9:1) to give Carboxylic acid **S12** (304 mg, 78% in 2 steps): white solid; <sup>1</sup>H-NMR (500 MHz, CD<sub>3</sub>OD) δ: 7.49-7.43 (m, 2H), 7.36-7.31 (m, 3H), 6.73 (d, *J* = 9.8 Hz, 1H), 5.51 (s, 1H), 4.43 (d, *J* = 8.5 Hz, 1H), 4.24 (dd, *J* = 10.3, 4.9 Hz, 1H), 3.87 (dt, *J* = 9.9, 5.8 Hz, 1H), 3.78 (t, *J* = 9.2 Hz, 1H), 3.76 (t, *J* = 10.1 Hz, 1H), 3.53 (dt, *J* = 10.0, 6.2 Hz, 1H), 3.45 (q, *J* = 9.8 Hz, 2H), 3.46-3.35 (m, 1H), 2.47-2.34 (m, 2H), 1.90-1.78 (m, 2H), 1.45 (s, 9H), 0.84 (s, 9H), 0.06 (s, 3H), -0.03 (s, 3H); <sup>13</sup>C-NMR (126 MHz, CD<sub>3</sub>OD) δ: 177.2, 158.1, 139.1, 130.0, 129.0, 127.6, 103.8, 103.0, 83.6, 80.1, 74.2, 69.8, 69.7, 67.3, 59.6, 31.3, 28.9, 26.5, 26.1, 19.1, -3.9, -4.5; HRMS (ESI-q-orbitrap) calcd for C<sub>28</sub>H<sub>44</sub>NO<sub>9</sub>Si<sup>−</sup> (M - H)<sup>−</sup> 566.2791, found: 566.2791.

#### B-FAPI4

Pyridine (7.1 µL, 88.1 µmol) and Pentafluorophenyl trifluoroacetate (15.0 µL, 88.1 µmol) were added to a solution of **S12** (10.0 mg, 17.6 µmol) in DMF (1.8 mL) at room temperature. After being stirred at room temperature for 2.5 h, the reaction mixture was concentrated and dried in vacuo. The residue was dissolved in DMF (3 mL) and **S6** (7.9 mg, 17.8 µmol) and DIPEA (14.7 µL, 84.5 µmol) were added to the mixture at room temperature. After being stirred at room temperature for 24 h, the reaction mixture was concentrated. The residue was purified by preparative thin layer chromatography with Acetone and CH<sub>2</sub>Cl<sub>2</sub> to give coupled **S13**, which was used for the next reaction without further purification.

TFA (160 µL) was added to a solution of **S13** in CH<sub>2</sub>Cl<sub>2</sub>/H<sub>2</sub>O (10:1) (1.76 mL) at 0 °C. After being stirred at room temperature for 2.5 h, the reaction mixture was concentrated. The residue was purified by reversed phase HPLC (2 % to 98 % linear gradient of acetonitrile in 0.1% TFA in water, over 60 min, flow rate of 7.0 mL/minute) to give **S14**, which was used for the next reaction without further purification.

DIPEA (2.4 µL, 13.5 µmol) was added to a solution of 4-(Carboxymethyl)phenylboronic acid (2.0 mg, 11.2 µmol) and HATU (4.3 mg, 11.2 µmol) in DMF (0.5 mL). The mixture was stirred at room temperature for 5 minutes. Then, **S14** in DMF was added. The mixture was stirred at room temperature for 4 h. After distilling the reaction solution under reduced pressure, the residue was purified by reversed phase HPLC (2 % to 98 % linear gradient of acetonitrile in 0.1% TFA in water, over 53 min, then 2 % to 98 % linear gradient of acetonitrile in 0.1% TFA in water, over 40 minutes, flow rate of 7.0 mL/minute) to give B-FAPI4 (3.6 mg, 24 % in 3 steps): white solid; [α]<sub>D</sub><sup>22</sup> - 1 (c 0.1, CH<sub>3</sub>CN); <sup>1</sup>H-NMR (700 MHz, D<sub>2</sub>O) δ: 8.85 (d, *J* = 4.6 Hz, 1H), 8.08-8.00 (m, 1H), 7.71 (d, *J* = 4.5 Hz, 1H), 7.65 (d, *J* = 2.7 Hz, 1H), 7.62 (d, *J* = 7.4 Hz, 2H), 7.56 (dd, *J* = 9.2, 2.8 Hz, 2H), 7.26 (d, *J* = 7.6 Hz, 2H), 5.22 (dd, *J* = 9.0, 3.9 Hz, 1H), 4.46-4.31 (m, 6H), 4.28-4.18 (m, 1H), 4.02 (t, *J* = 4.2 Hz, 2H), 3.93 (d, *J* = 12.2 Hz, 1H), 3.79 (t, *J* = 5.3 Hz, 2H), 3.78-3.64 (m, 3H), 3.62-3.53 (m, 3H), 3.50-3.39 (m, 4H), 3.36-3.30 (m, 1H), 3.09-2.96 (m, 1H), 2.00-1.84 (m, 2H), 1.60-1.54 (m, 2H); <sup>13</sup>C-NMR (700 MHz, D<sub>2</sub>O) δ: 176.7, 169.8, 163.5, 158.0, 134.6, 129.1, 104.7, 101.5, 76.4, 74.2, 70.6, 69.7, 69.5, 69.3, 68.4, 61.4, 56.2, 45.4, 43.5, 42.7, 39.7, 32.9, 30.9, 25.9; HRMS (ESI-q-orbitrap) calcd for C<sub>39</sub>H<sub>47</sub>BF<sub>2</sub>N<sub>6</sub>O<sub>13</sub>Na<sup>+</sup> (M + Na)<sup>+</sup> 879.3154, found: 879.3160.

#### 1-7. Synthetic procedure of B-FAPI5

B-FAPI5 was synthesized according to a procedure laid out in the literature.<sup>3</sup>

**1-8.  $^1\text{H}$ - and  $^{13}\text{C}$  NMR spectra**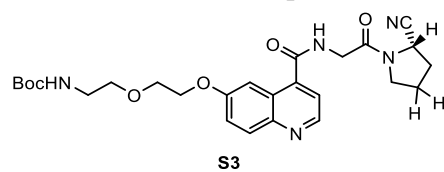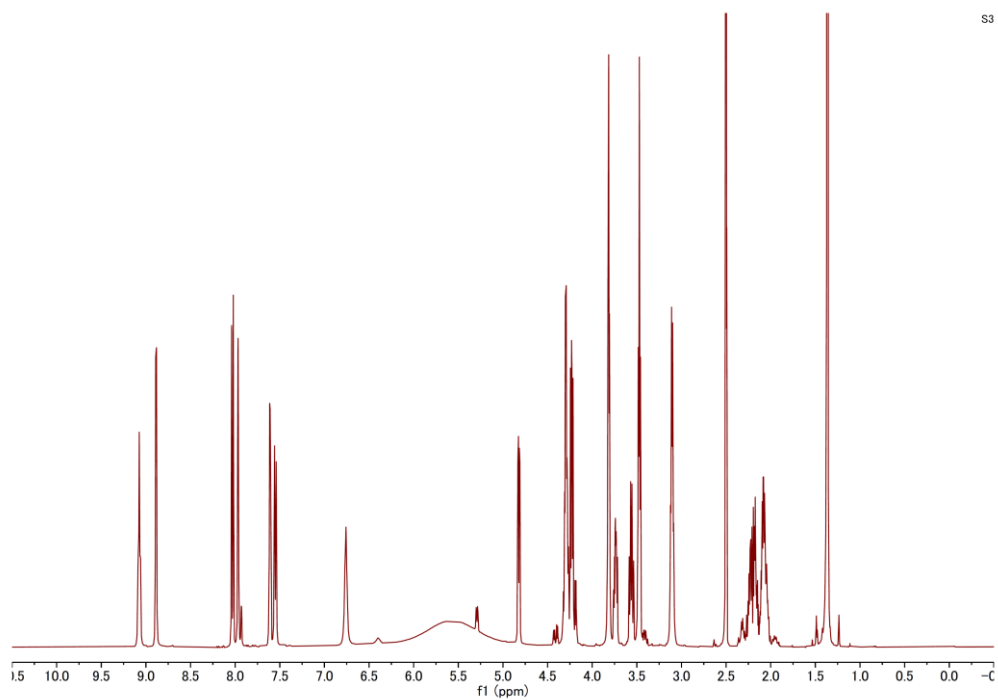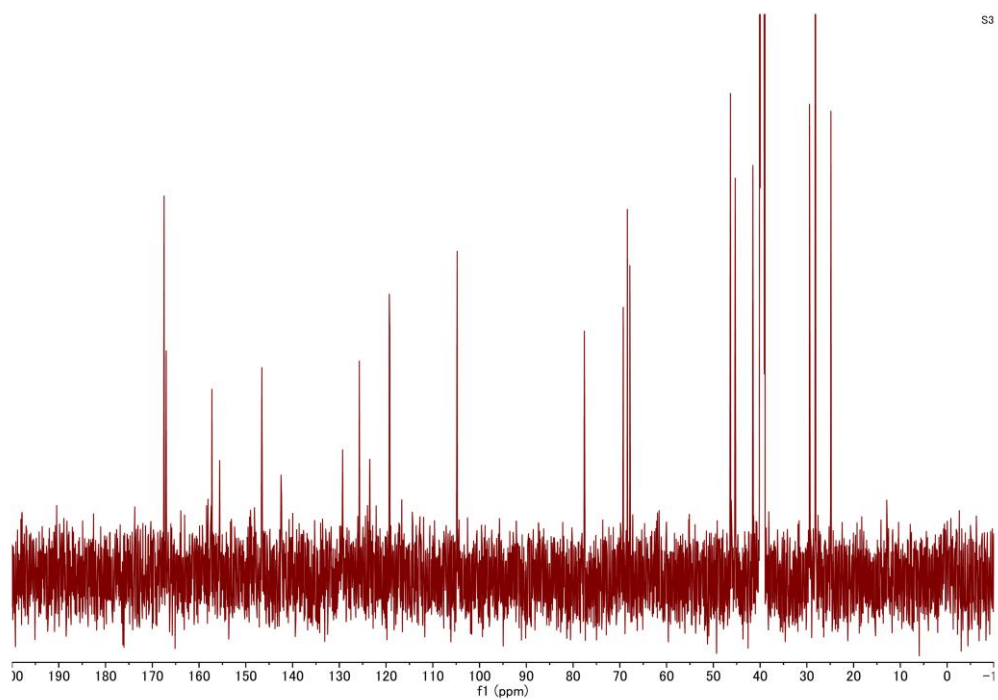

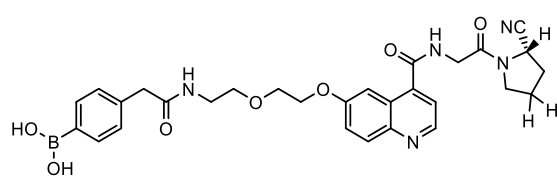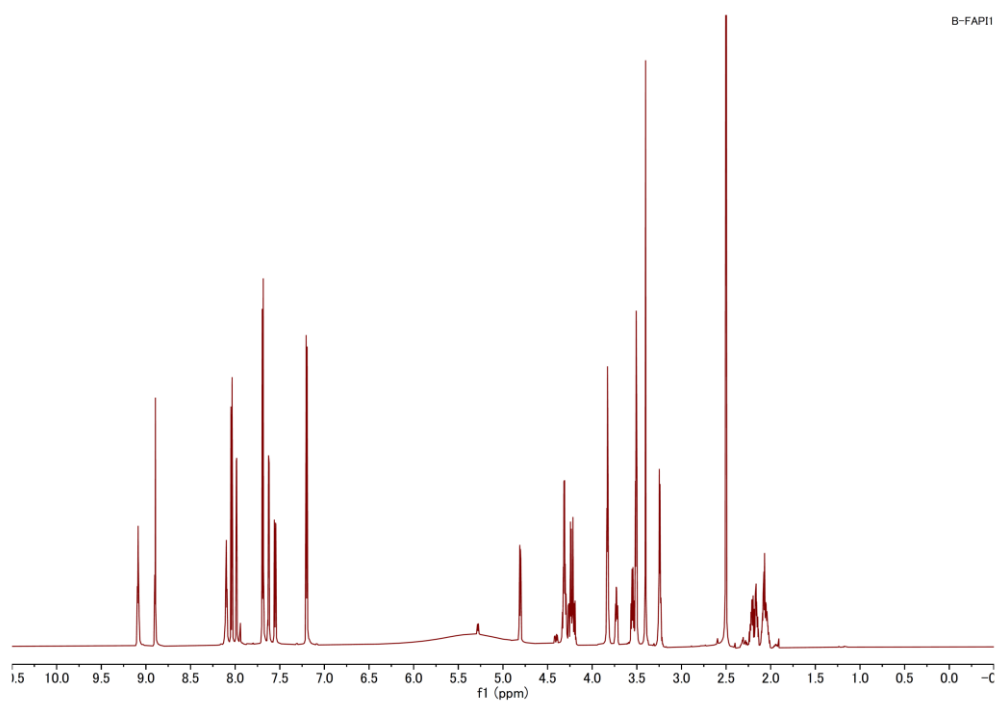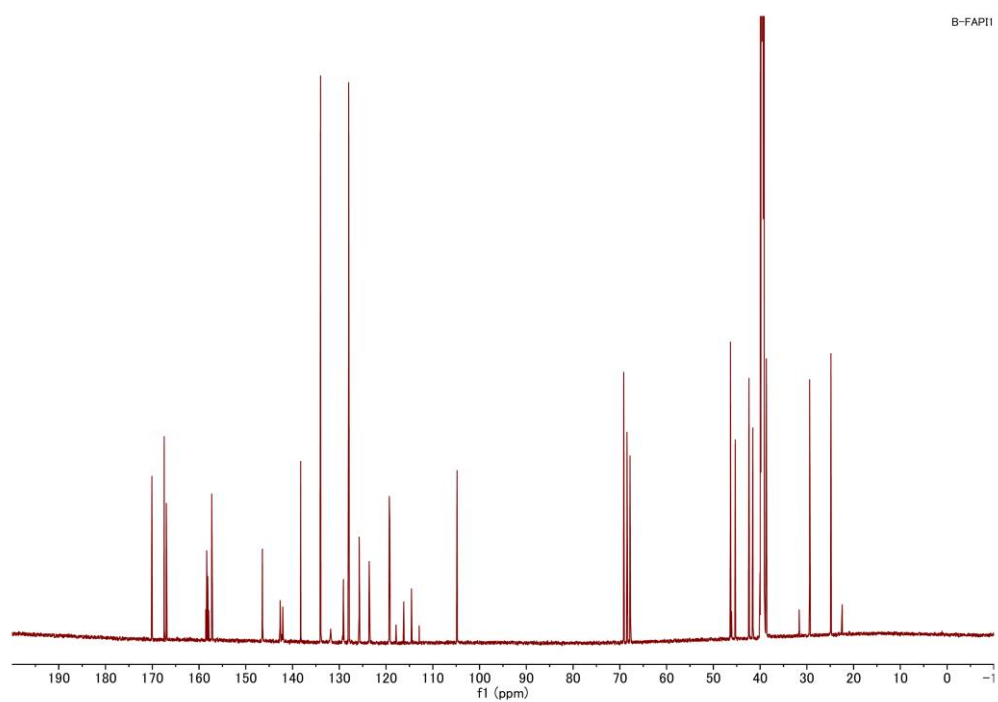

**S5**

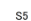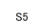

B-FAPI2

B-FAP12

B-FAP12

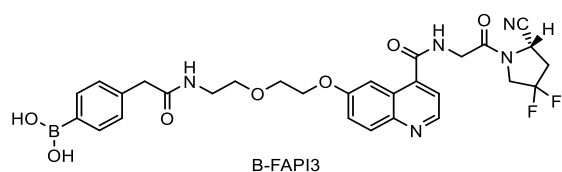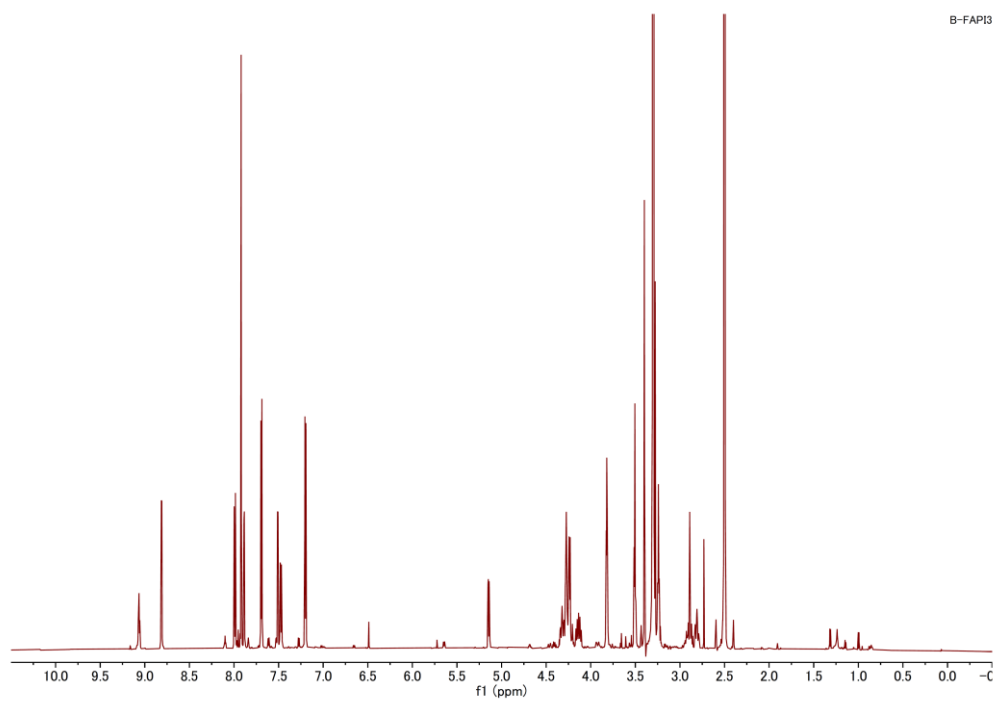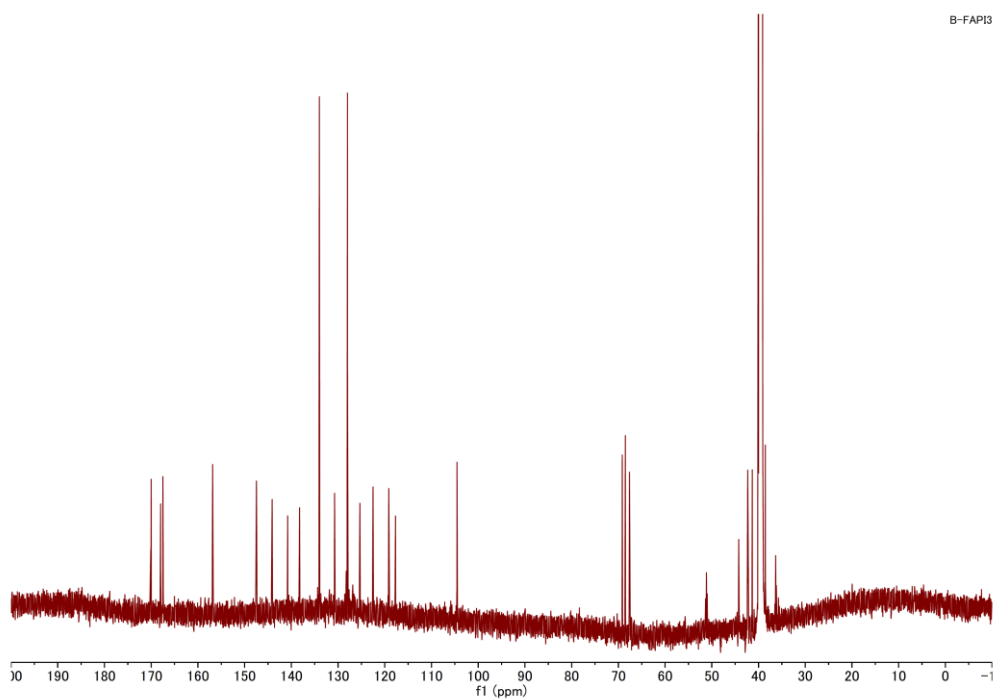

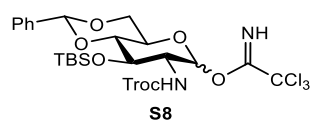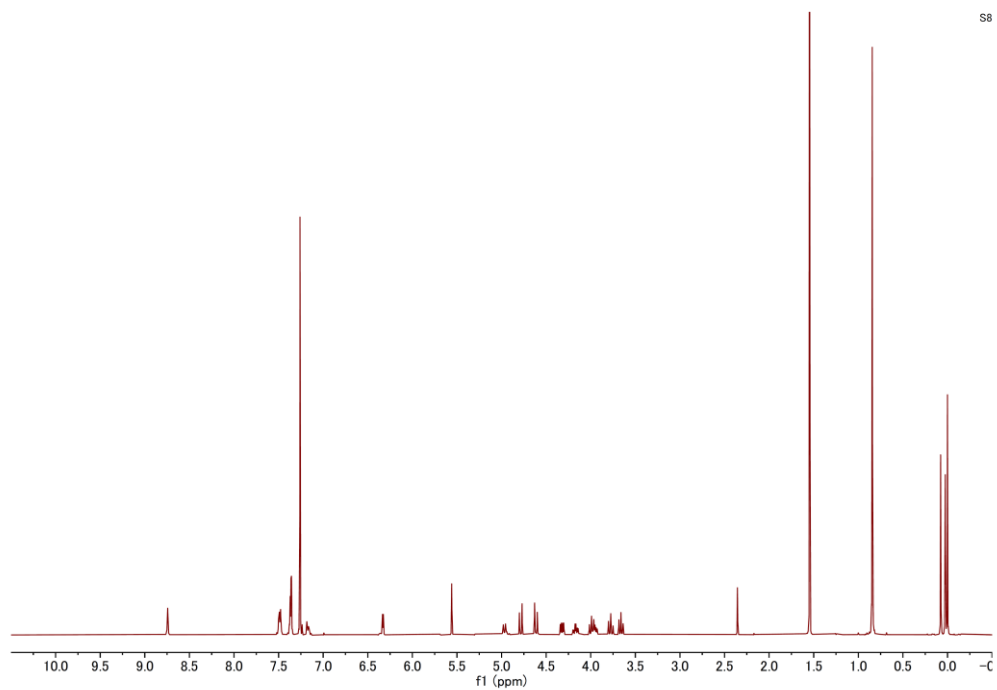

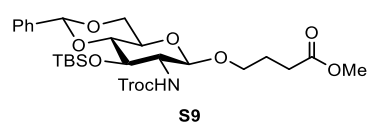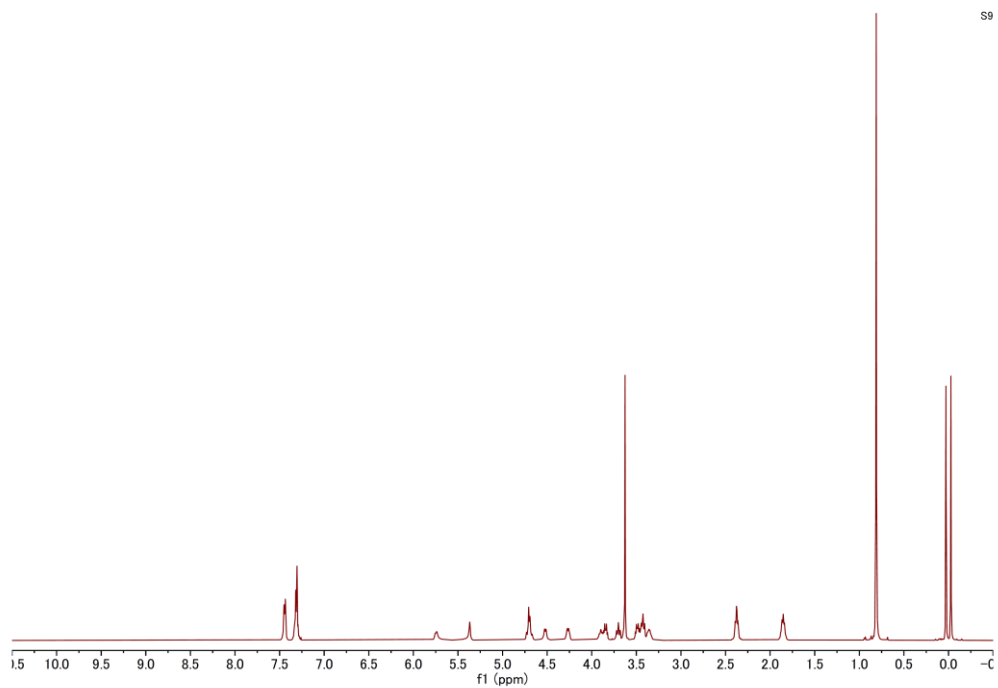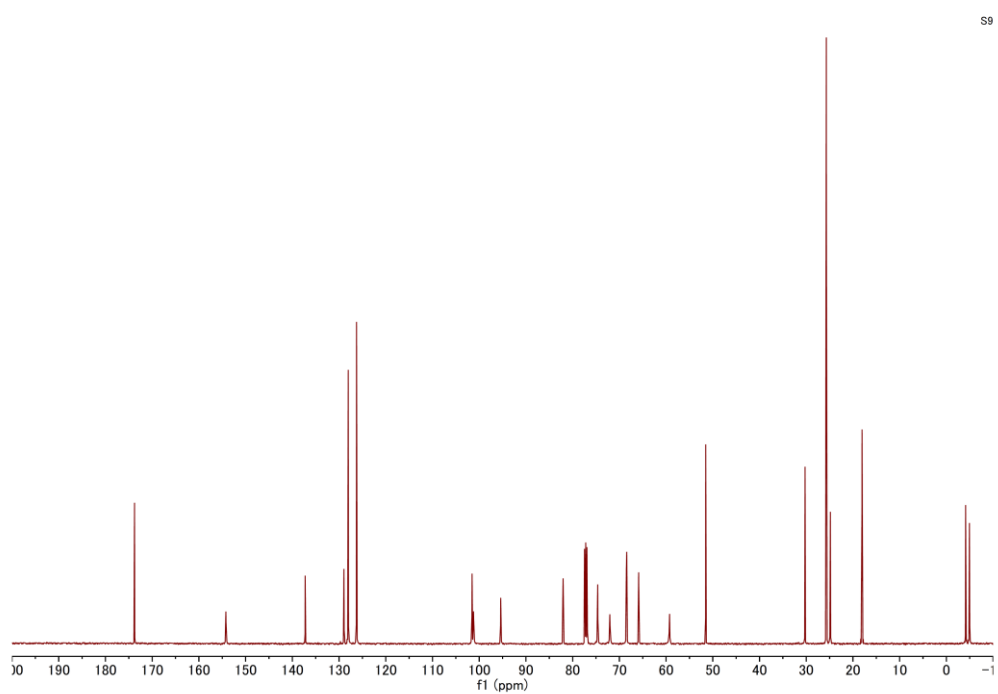



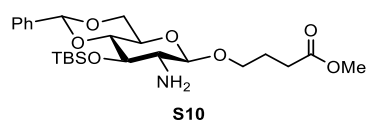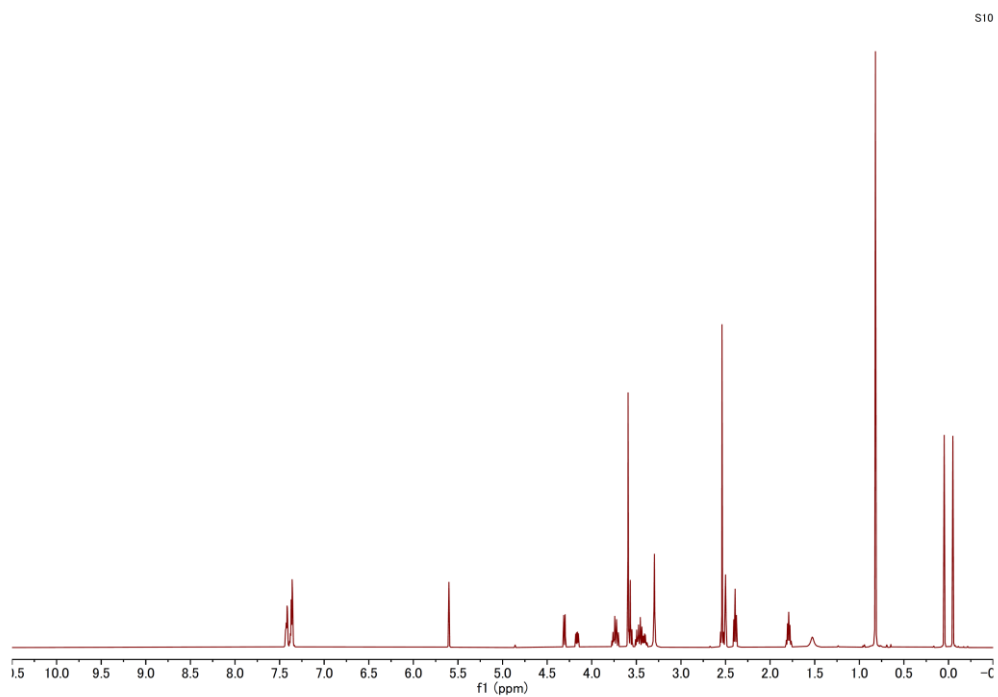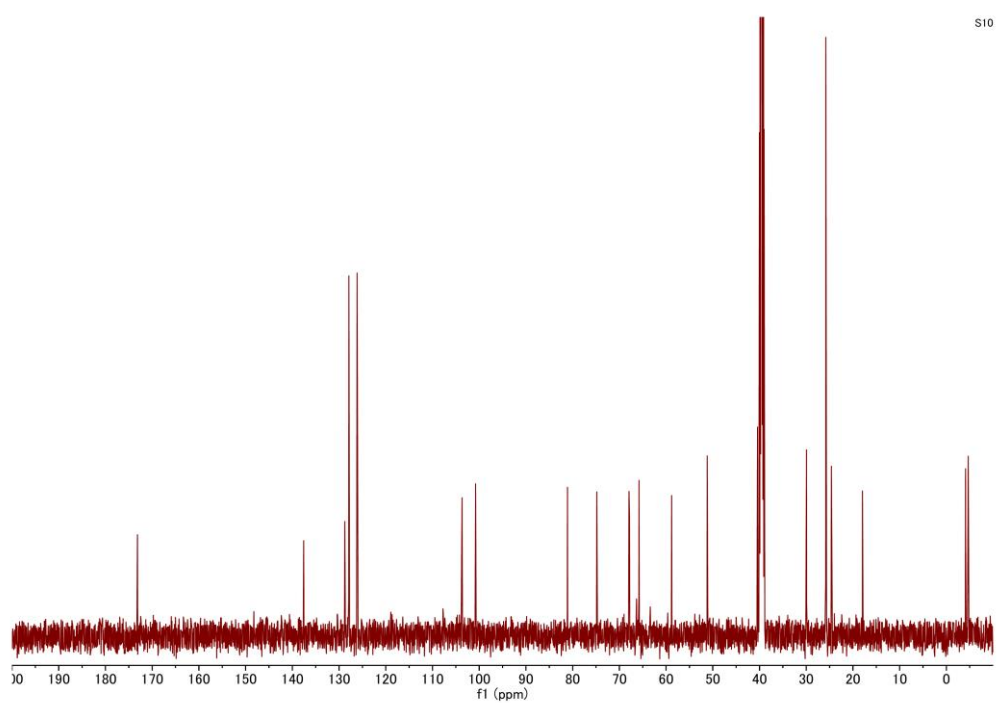

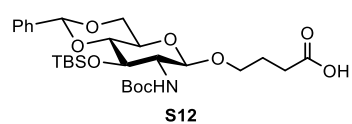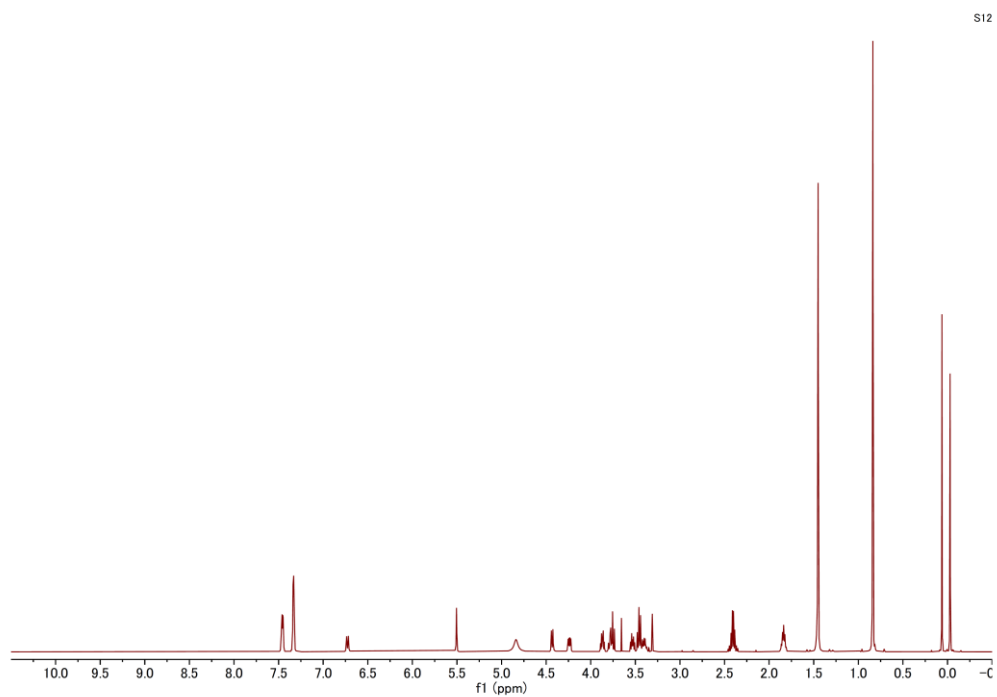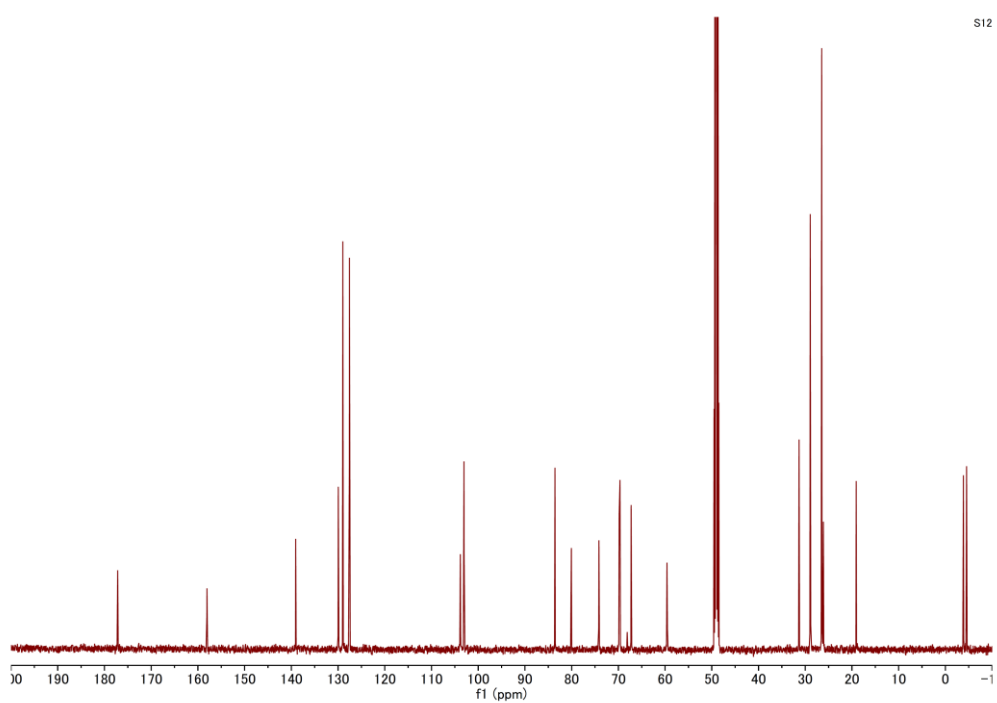

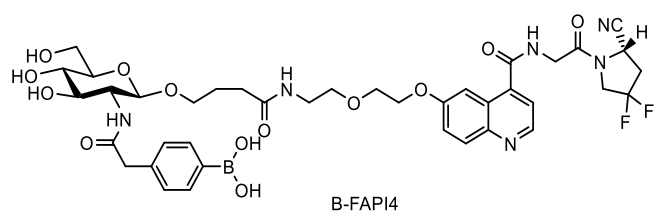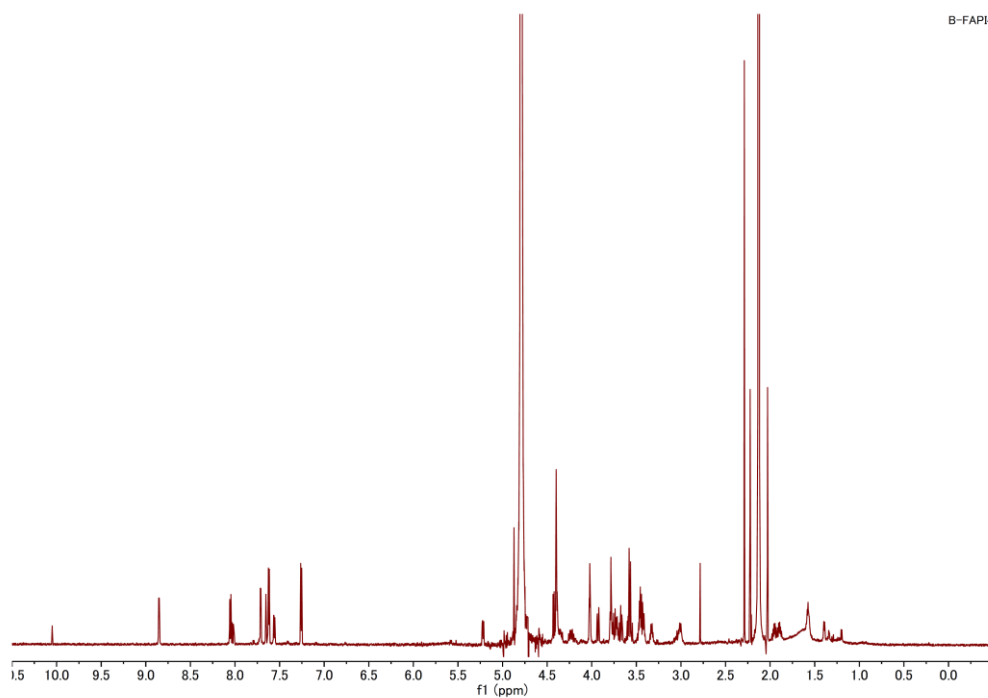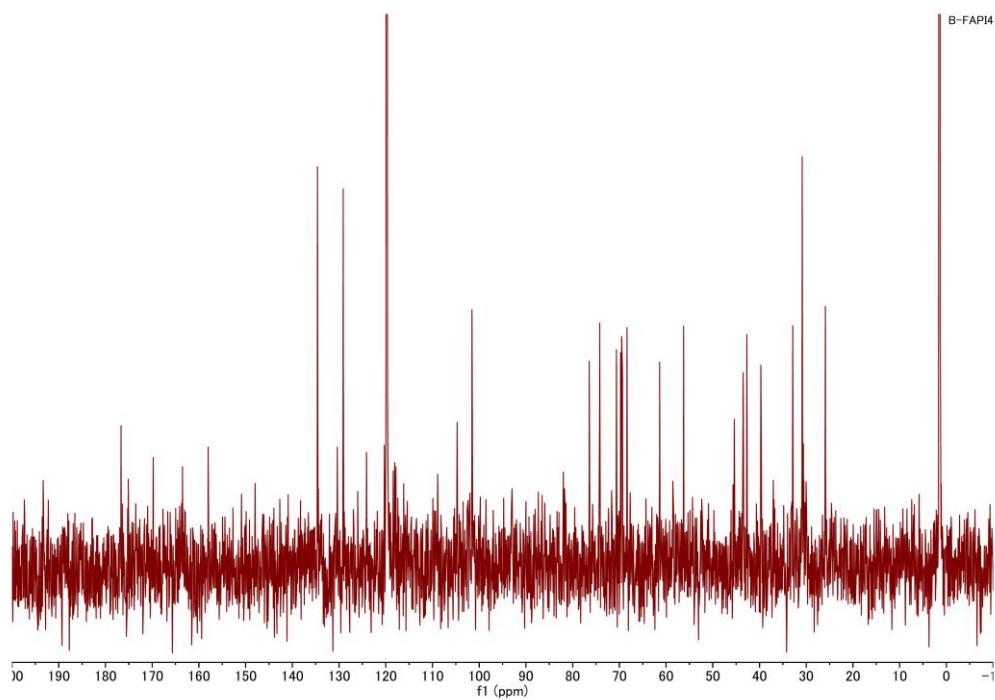

## 1-9. MS spectra

NBoc-FAPI-PEG-1\_posi #3 RT: 0.01 AV: 1 NL: 4.22E8  
T: FTMS + p ESI Full lock ms [200.0000-1000.0000]

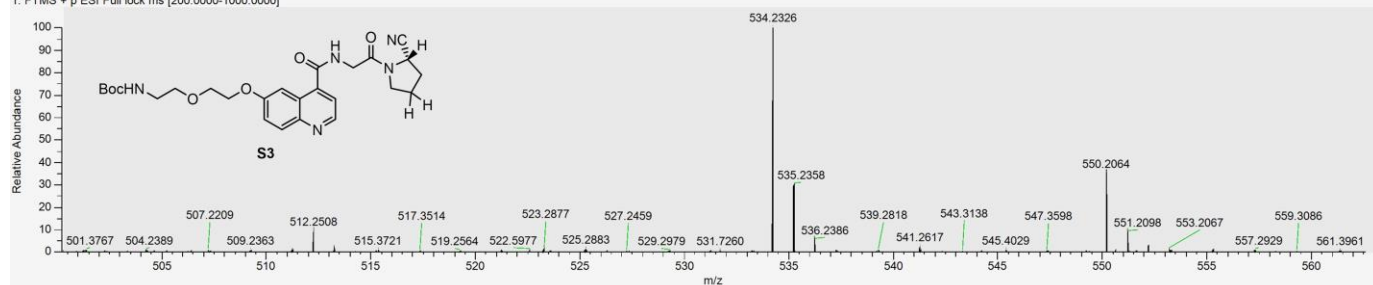

AH-875\_posi #3 RT: 0.01 AV: 1 NL: 3.81E7  
T: FTMS + p ESI Full lock ms [200.0000-1000.0000]

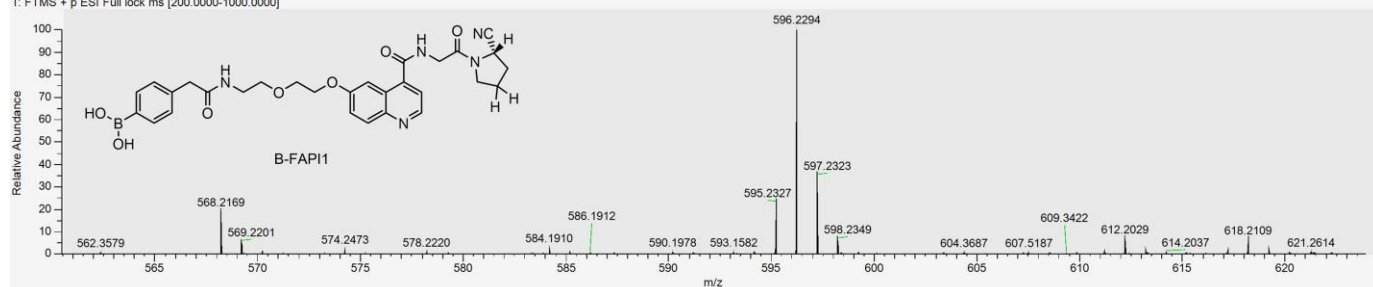

S5-2 #22 RT: 0.29 AV: 1 NL: 1.36E9  
T: FTMS + p ESI Full lock ms [200.0000-3000.0000]

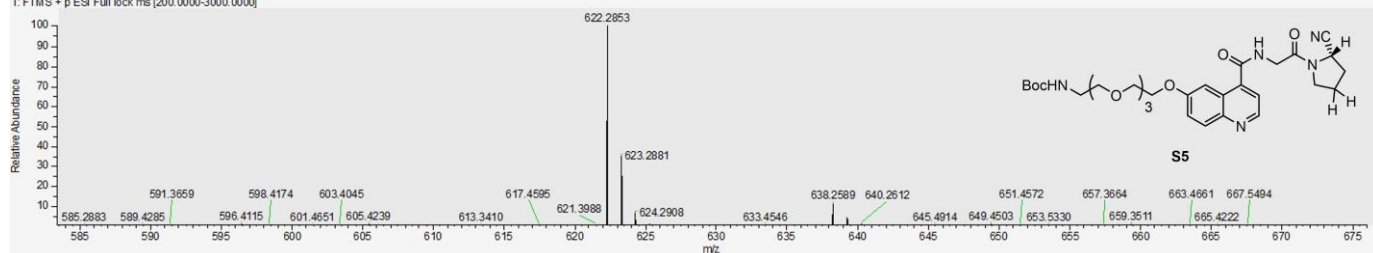

AP-022\_posi #3 RT: 0.01 AV: 1 NL: 1.52E8  
T: FTMS + p ESI Full lock ms [200.0000-1000.0000]

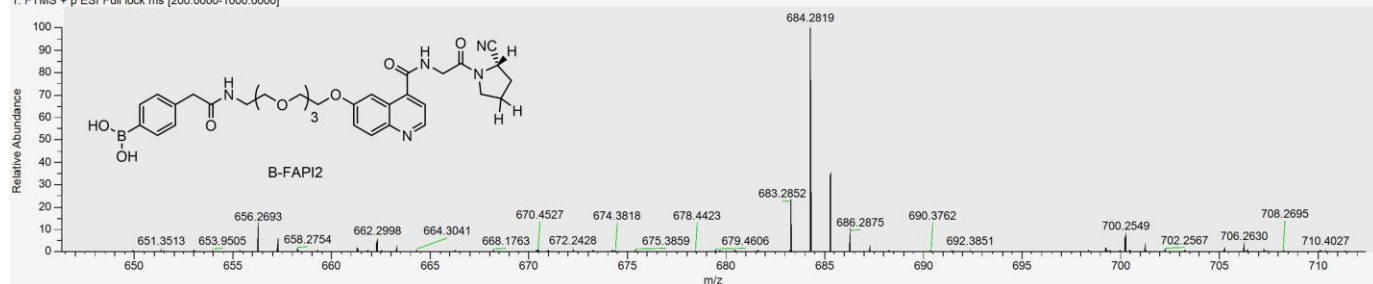

B-FAPI3 #24 RT: 0.32 AV: 1 NL: 3.85E7  
T: FTMS + p ESI Full lock ms [200.0000-3000.0000]

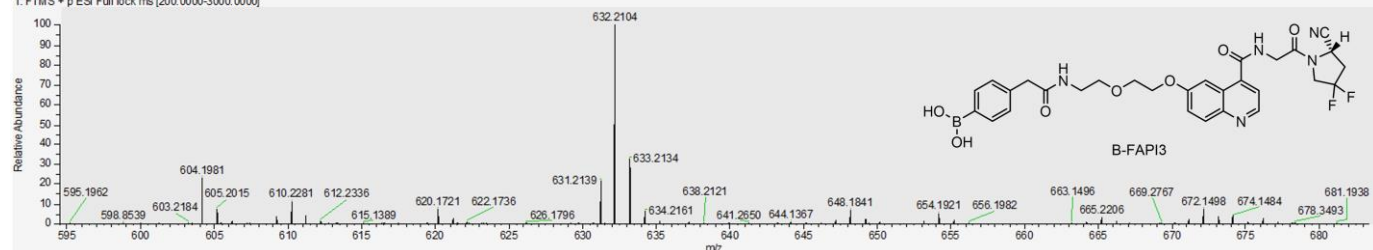

AA-32 #1-50 RT: 0.01-0.44 AV: 50 NL: 1.76E8  
T: FTMS + p ESI Full lock ms [350.0000-1500.0000]

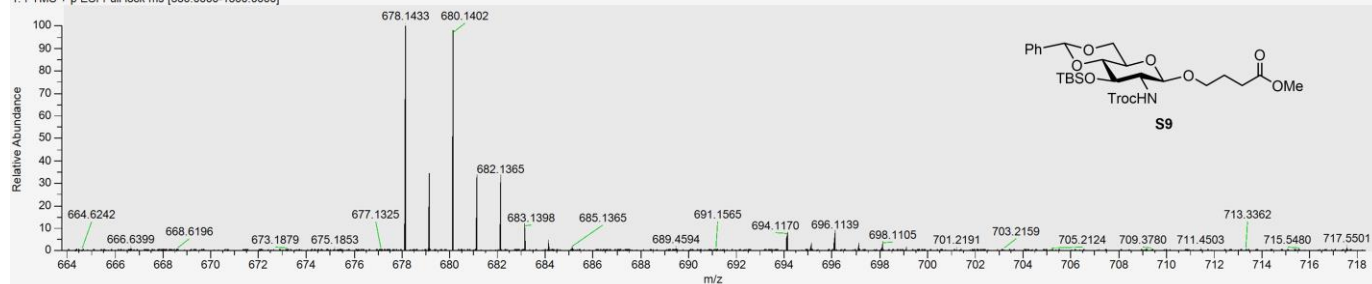

AA-256\_posi #3 RT: 0.01 AV: 1 NL: 4.34E9  
T: FTMS + p ESI Full ms [200.0000-1000.0000]

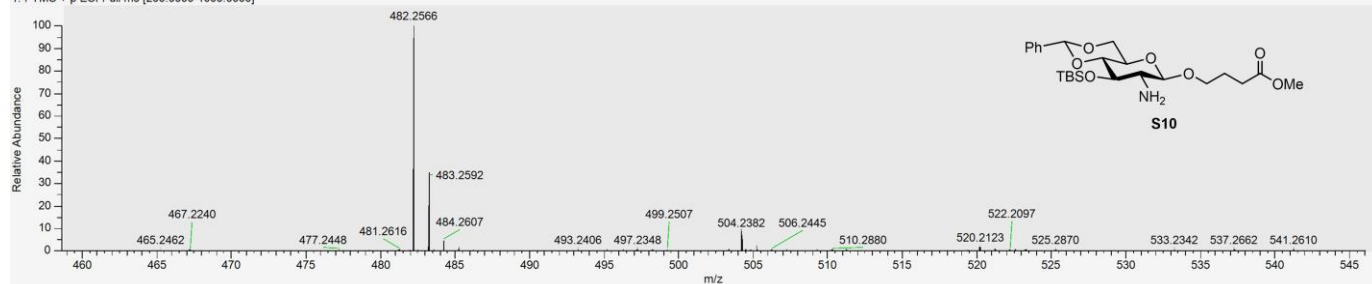

AA-122 #1-50 RT: 0.01-0.44 AV: 50 NL: 5.32E6  
T: FTMS - p ESI Full ms [350.0000-1500.0000]

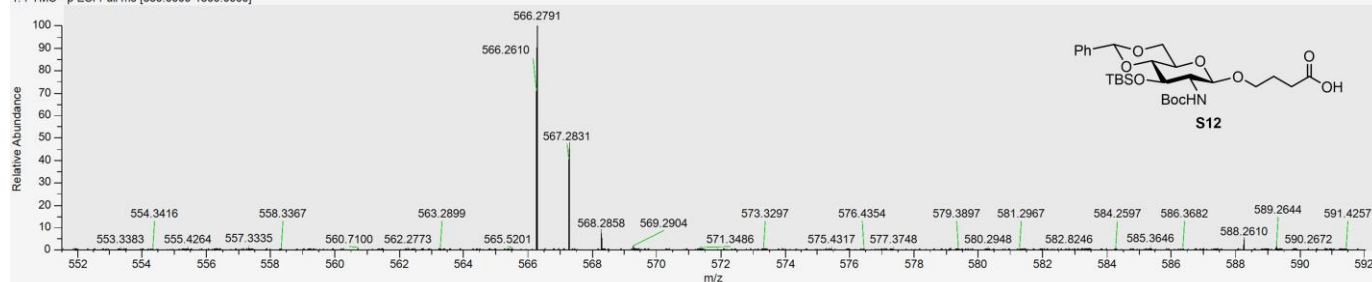

AA-245 #2 RT: 0.02 AV: 1 NL: 2.82E6  
T: FTMS + p ESI Full lock ms [350.0000-1500.0000]

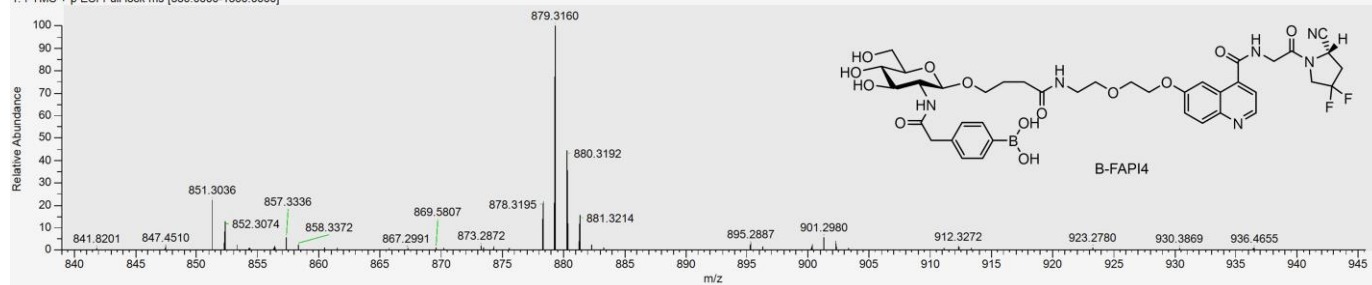

### 1-10. Synthetic procedure of $^{211}\text{At}$ -FAPI(s)

#### General procedure of $^{211}\text{At}$ -labeling

Overall, 0.1 % aqueous B-FAPI (10  $\mu\text{L}$ ), 7 % aqueous  $\text{NaHCO}_3$  (10  $\mu\text{L}$ ),  $\text{H}_2\text{O}$  (90  $\mu\text{L}$ ), aqueous  $^{211}\text{At}$  and 0.1 M aqueous KI (30  $\mu\text{L}$ ) were added to a polypropylene (PP) tube at room temperature. After being heated at 50  $^\circ\text{C}$  or 80  $^\circ\text{C}$  for 45 min, the reaction mixture was cooled down to room temperature. The radiochemical yield (RCY) was analyzed by TLC ( $\text{CH}_3\text{CN}/\text{H}_2\text{O} = 33:17$ ). The TLC plate was exposed to an imaging plate, and then the imaging plate was scanned by an image analyzer. For purification, the reaction mixture was directly loaded to an Oasis HLB column, and the column was rinsed with  $\text{H}_2\text{O}$  (1.0 mL) and  $\text{EtOH}/\text{H}_2\text{O}$  (2:3) (500  $\mu\text{L}$ ), and then  $^{211}\text{At}$ -FAPI1,  $^{211}\text{At}$ -FAPI2,  $^{211}\text{At}$ -FAPI3,  $^{211}\text{At}$ -FAPI4 and  $^{211}\text{At}$ -FAPI5 were eluted by  $\text{EtOH}$  (500  $\mu\text{L}$ ). After the purification, radiochemical purity (RCP) was analyzed using TLC.

| Substrate                                  | B-FAPI1 | B-FAPI2 | B-FAPI3 | B-FAPI4 | B-FAPI5 |
|--------------------------------------------|---------|---------|---------|---------|---------|
| 0.1 % aq. B-FAPI ( $\mu\text{L}$ )         | 10      |         |         |         |         |
| 7 % aq. $\text{NaHCO}_3$ ( $\mu\text{L}$ ) | 10      |         |         |         |         |
| $\text{H}_2\text{O}$ ( $\mu\text{L}$ )     | 90      |         |         |         |         |
| 0.1M aq. KI ( $\mu\text{L}$ )              | 30      |         |         |         |         |
| aq. $^{211}\text{At}$ ( $\mu\text{L}$ )    | 14      | 2.1     | 19      | 19      | 10      |
| Radioactivity (MBq)                        | 0.28    | 0.66    | 0.62    | 0.60    | 1.01    |
| Reaction time (min)                        | 45      |         |         |         |         |
| Temperature ( $^\circ\text{C}$ )           | 80      |         | 50      |         | 80      |
| RCY (%)                                    | 100     | 99      | 45      | 15      | 90      |
| RCP (%)                                    | 100     | 100     | 96      | 78      | 95      |

Table S1. Radiochemical yield (RCY) and Radiochemical Purity (RCP) of  $^{211}\text{At}$ -FAPI1,  $^{211}\text{At}$ -FAPI2,  $^{211}\text{At}$ -FAPI3,  $^{211}\text{At}$ -FAPI4 and  $^{211}\text{At}$ -FAPI5.

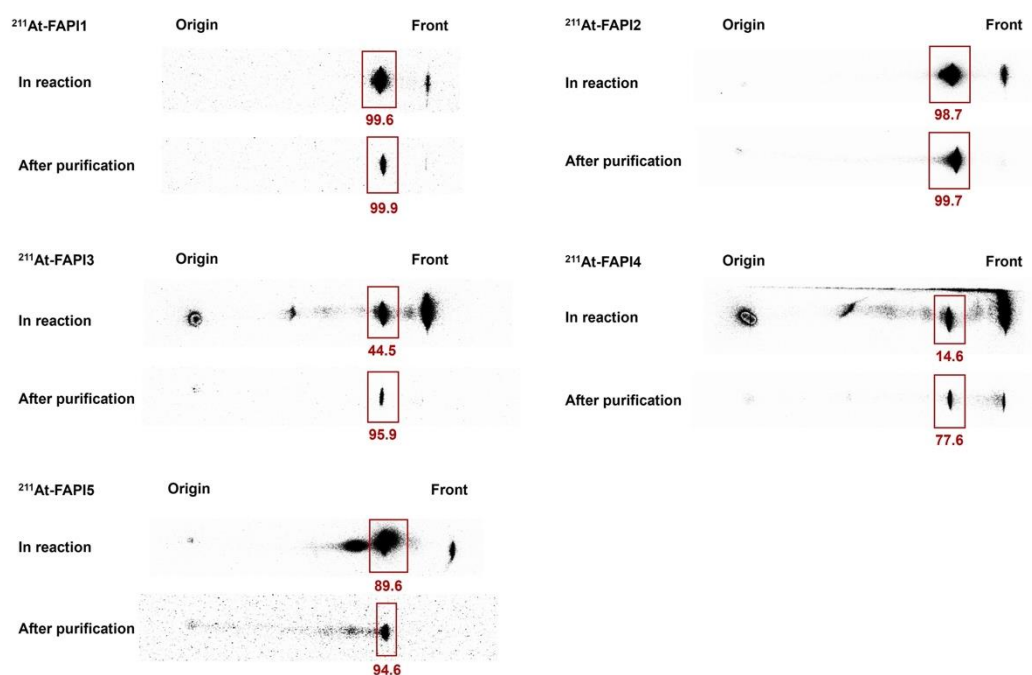

Figure S1. TLC analysis of  $^{211}\text{At}$ -FAPI1,  $^{211}\text{At}$ -FAPI2,  $^{211}\text{At}$ -FAPI3,  $^{211}\text{At}$ -FAPI4 and  $^{211}\text{At}$ -FAPI5.

| $^{211}\text{At}$ -FAPI1 |         |         | $^{211}\text{At}$ -FAPI5 |         |         |
|--------------------------|---------|---------|--------------------------|---------|---------|
| No.                      | RCY (%) | RCP (%) | No.                      | RCY (%) | RCP (%) |
| 1                        | 98.5    | 99.5    | 1                        | 89.6    | 90.9    |
| 2                        | 97.8    | 96.4    | 2                        | 81.4    | 75.0    |
| 3                        | 98.0    | 94.7    |                          |         |         |
| 4                        | 98.8    | 99.9    |                          |         |         |
| 5                        | 99.6    | 99.9    |                          |         |         |
| Average                  | 98.5    | 98.1    | Average                  | 85.5    | 83.0    |
| SD                       | 0.7     | 2.4     | SD                       | 5.8     | 11.2    |

Table S2. Average  $\pm$  SD of radiochemical yield (RCY) and Radiochemical Purity (RCP) of  $^{211}\text{At}$ -FAPI1 (n = 5) and  $^{211}\text{At}$ -FAPI5 (n = 2).

### 1-11. Synthetic procedure of $^{131}\text{I}$ -FAP(s)

#### General procedure of $^{131}\text{I}$ -labeling

B-FAPI (1 mg),  $\text{H}_2\text{O}$  (80  $\mu\text{L}$ ), aqueous  $^{131}\text{I}$ -NaI and 0.4 % aqueous *N*-Bromosuccinimide (NBS) (30  $\mu\text{L}$ ) were added to polypropylene (PP) tube at room temperature. After being heated at 80  $^{\circ}\text{C}$  for 30 minutes, the reaction mixture was cooled down to room temperature. The radiochemical yield (RCY) was analyzed by TLC ( $\text{CH}_3\text{CN}/\text{H}_2\text{O} = 33:17$ ). The TLC plate was exposed to an imaging plate, and then the imaging plate was scanned by an image analyzer. After adding 4 % aqueous ascorbic acid (10  $\mu\text{L}$ ), the mixture was stirred for 15 min. For purification, the reaction mixture was directly loaded to an Oasis HLB column, and the column was rinsed with  $\text{H}_2\text{O}$  (1.0 mL) and  $\text{EtOH}/\text{H}_2\text{O}$  (2:3) (500  $\mu\text{L}$ ), and then  $^{131}\text{I}$ -FAP1 and  $^{131}\text{I}$ -FAP5 were eluted by  $\text{EtOH}$  (500  $\mu\text{L}$ ). After the purification, radiochemical purity (RCP) was analyzed via TLC.

| Substrate                              | B-FAP1 | B-FAP5 |
|----------------------------------------|--------|--------|
| B-FAP (mg)                             | 1      |        |
| $\text{H}_2\text{O}$ ( $\mu\text{L}$ ) | 80     |        |
| 0.4 % aq. NBS ( $\mu\text{L}$ )        | 30     |        |
| aq. $^{131}\text{I}$ ( $\mu\text{L}$ ) | 28     | 30     |
| Radioactivity (MBq)                    | 6.76   | 6.77   |
| Reaction time (min)                    | 30     |        |
| Temperature ( $^{\circ}\text{C}$ )     | 80     |        |
| RCY (%)                                | 13     | 51     |
| RCP (%)                                | 91     | 99     |

Table S3. Radiochemical yield (RCY) of  $^{131}\text{I}$ -FAP1 and  $^{131}\text{I}$ -FAP5.

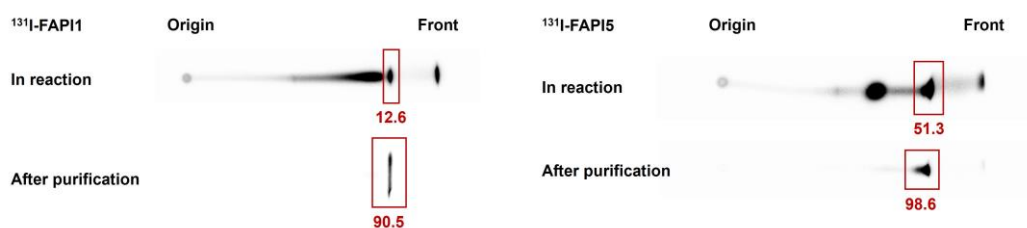

Figure S2. TLC analysis of  $^{131}\text{I}$ -FAP1 and  $^{131}\text{I}$ -FAP5



## 2. References

1. Hu, K.; Li, J.; Wang, L.; Huang, Y.; Li, L.; Ye, S.; Han, Y.; Huang, S.; Wu, H.; Su, J.; Tang, G. Preclinical evaluation and pilot clinical study of [ $^{18}\text{F}$ ]AlF-labeled FAPI-tracer for PET imaging of cancer associated fibroblasts. *Acta Pharm. Sinica B* 2022, 12, 867–875. DOI: 10.1016/j.apsb.2021.09.032
2. Scholz, S. O.; Farney, E. P.; Kim, S.; Bates, D. M.; Yoon, T. P. Spin-Selective Generation of Triplet Nitrenes: Olefin Aziridination through Visible-Light Photosensitization of Azidoformates. *Angew. Chem. Int. Ed.* 2016, 55, 2239–2242. DOI: 10.1002/anie.201510868
3. Aso, A.; Kaneda-Nakashima, K.; Nabetani, H.; Kadonaga, Y.; Shirakami, Y.; Watabe, T.; Yoshiya, T.; Mochizuki, M.; Koshino, Y.; Ooe, K.; Kawakami, A.; Jinno, N.; Toyoshima, A.; Haba, H.; Wang, Y.; Cardinale, J.; Giesel, F. L.; Shimoyama, A.; Fukase, K. Substrate Study for Dihydroxyboryl Astatine Substitution Reaction with Fibroblast Activation Protein Inhibitor (FAPI). *Chem. Lett.* 2022, 51, 1091–1094. DOI: 10.1246/cl.220391
