# Supplementary material for: Evaluation of Astatine-211-Labeled Fibroblast Activation Protein Inhibitor (FAPI): Comparison of Different Linkers with Polyethylene Glycol and Piperazine
Source: MDPI journal article supplement (doi:10.3390/ijms24108701), 2023-05-12
Supplement: s1 [file s1]

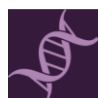

# Evaluation of Astatine-211-Labeled Fibroblast Activation Protein Inhibitor (FAPi): Comparison of Different Linkers with Polyethylene Glycol and Piperazine

Ayaka Aso, Hinako Nabetani, Yoshifumi Matsuura, Yuichiro Kadonaga, Yoshifumi Shirakami, Tadashi Watabe\*, Taku Yoshiya, Masayoshi Mochizuki, Kazuhiro Ooe, Atsuko Kawakami, Naoya Jinno, Atsushi Toyoshima, Hiromitsu Haba, Yang Wang, Jens Cardinale, Frederik L. Giesel, Atsushi Shimoyama, Kazuko Kaneda-Nakashima\*, Koichi Fukase

## Supporting Information

### Establishment of FAP $\alpha$ over expression cell lines

Lentivirus vector was produced by the widely known protocol. pLenti-GIII-CMV-RFP-2A-Puro was transfected into 293T cells with two plasmids (pCAG-HIVgp as envelope and pCMV-VSV-G-RSV-Rev as virus protein) by according to HilyMax (DOJINDO LABORATORIES, Kumamoto, Japan) transfection protocol. 293T cells were kindly provided from RIKEN. Once produced, lentivirus was used for stable-cell line generation.

Infected A549 and HEK293 cells were selected under puromycin existing medium. After single cloning using RFP fluorescence as a marker, the cells were scaled up, and finally FAP $\alpha$  expression was confirmed with a flow cytometer.

### Measurement of FAP $\alpha$ expression

Cells were dispersed by Trypsin-EDTA treatment, and washed three times by PBS(-). Counted and resuspended  $1 \times 10^5$  cells/tube in 50  $\mu$ L MACS buffer: 2mM EDTA(pH8.0), 0.5 % Bovine Serum Albumin (BSA) in PBS(-). Cells were treated with FAP $\alpha$  antibody (FAB3715A, R&D Systems, Minneapolis, MN, USA) on ice for 30 minutes, and washed three times by PBS(-), and analyzed by Attune NxT flow cytometer. Over expression cell lines had high red fluorescence intensity and FAP $\alpha$  expression (**Supplementary Figure 1**).

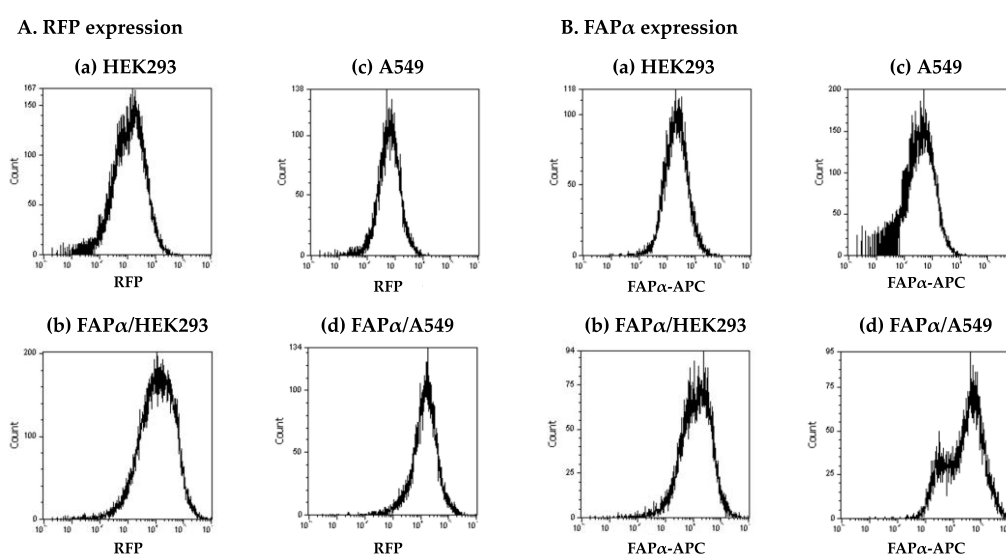

**Supplementary Figure S1.** Confirmation of expression levels of FAP $\alpha$  in established cultured cell lines. The vertical axis of the histogram indicates the number of cells, and the horizontal axis indicates the expression level of RFP (A) or FAP $\alpha$  (B).
